# Supplementary material
Source: HighWire-hosted journal article supplement (https://bmjopenquality.bmj.com/content/8/4/e000725)
Supplement: inline-supplementary-material-1 [file inline-supplementary-material-1.pdf]

# Appendix 1. Pre-Clinic Huddle Template

Confidential

Page 1 of 2

## Pre-Clinic Huddle

Please complete the survey below.

Thank you!

Date \_\_\_\_\_

Clinic (AM/PM)

- AM
- PM

Attending

- L
- B
- B
- K
- W
- S
- G
- W
- M
- Chang

Fellow

- C
- B
- N
- Li
- P
- R
- C

Did a huddle occur?

- Yes
- No

If no, explain \_\_\_\_\_

### NPV

|                                                                                                      | Yes                   | No                    | Not Asked             |
|------------------------------------------------------------------------------------------------------|-----------------------|-----------------------|-----------------------|
| Has the physician prescreened their NPVs?                                                            | <input type="radio"/> | <input type="radio"/> | <input type="radio"/> |
| Do any NPVs screen into a potential diagnosis of any JIA, ERA, SI, JDM, or IBD arthritis/enthesitis? | <input type="radio"/> | <input type="radio"/> | <input type="radio"/> |

Confidential

Page 2 of 2

**Follow Up**

|                                                                                                                                                                                                                | Yes                   | No                    | Not Asked             |
|----------------------------------------------------------------------------------------------------------------------------------------------------------------------------------------------------------------|-----------------------|-----------------------|-----------------------|
| Did the RRC identify which follow up patients need to be seen for research?                                                                                                                                    | <input type="radio"/> | <input type="radio"/> | <input type="radio"/> |
| Are there any follow up patients who may newly meet diagnostic criteria for any JIA, ERA, SI, JDM, or IBD arthritis/enthesitis that have not yet started a DMARD or biologic OR a pelvic MRI is being ordered? | <input type="radio"/> | <input type="radio"/> | <input type="radio"/> |
| Are there any patients with a history of IBD or potential new IBD?                                                                                                                                             | <input type="radio"/> | <input type="radio"/> | <input type="radio"/> |
| Are there any patients potentially starting methotrexate?                                                                                                                                                      | <input type="radio"/> | <input type="radio"/> | <input type="radio"/> |
| PROMOTE follow up: biologic added/MTX stopped?                                                                                                                                                                 | <input type="radio"/> | <input type="radio"/> | <input type="radio"/> |
| Are there any active pJIA, PsA, ERA, SI, or IBD patients? Only one active joint required.                                                                                                                      | <input type="radio"/> | <input type="radio"/> | <input type="radio"/> |

Does the patient have any of the following?

- New-onset IBD (within the past 45 days)
- Active IBD
- Active arthritis
- New-onset ERA (within the past 45 days)
- Existing ERA with new-onset IBD

RA Initials

\_\_\_\_\_

Comments

\_\_\_\_\_  
 ((Required Patient Identifiers or Other Important Information))
